# Supplementary material for: Self-assembly and solvent-mediated structural transformation of one-dimensional cluster-based coordination polymer
Source: Royal Society of Chemistry journal article supplement (doi:10.1039/c004119j), 2010-08-27
Supplement: c004119j.pdf [file c004119j.pdf]

## SUPPORTING INFORMATION

---

**Self-Assembly and solvent-mediated structural transformation of  
one-dimensional cluster-based coordination polymer**

Jian-Jun Zhang<sup>a</sup>, Cynthia S. Day<sup>b</sup>, Abdessadek Lachgar<sup>b\*</sup>

<sup>a</sup> *Department of Chemistry, Dalian University of Technology, Dalian, Liaoning  
116024, PR China*

<sup>b</sup> *Department of Chemistry, Wake Forest University, Winston-Salem, North Carolina  
27109, USA*

---

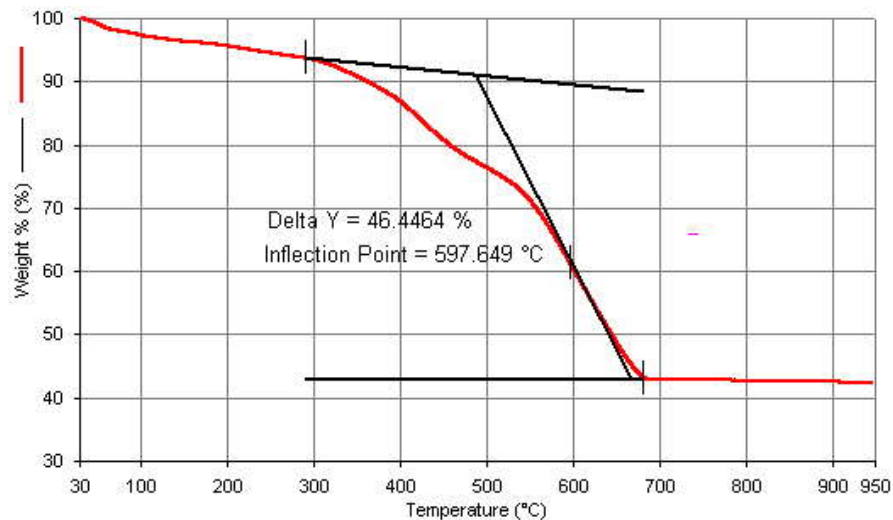

**Figure S1.** TGA plot heated from 30 °C to 950 °C at 5 °C/min under a flow of air (40 mL/min).

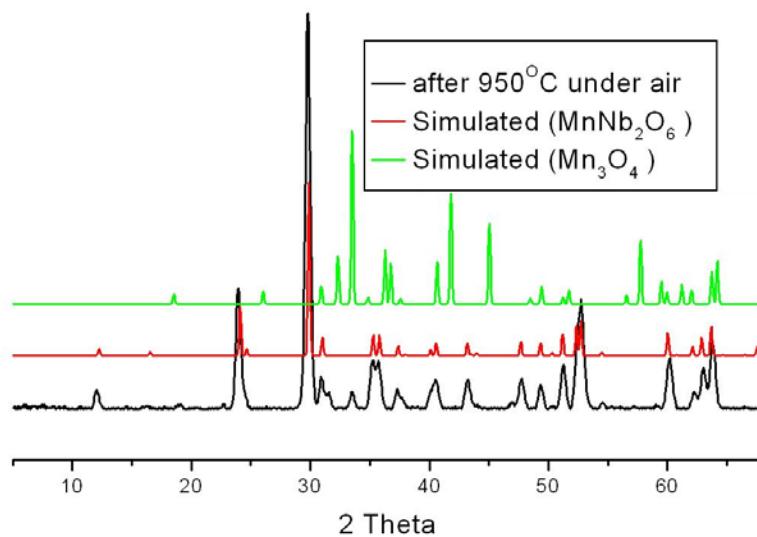

**Figure S2.** Comparison of powder patterns of **1** after 950 °C with that simulated from  $\text{MnNb}_2\text{O}_6$  and  $\text{Mn}_3\text{O}_4$ .
